# Supplementary material for: Real-World Use of Oral Semaglutide in Adults with Type 2 Diabetes: The PIONEER REAL Switzerland Multicentre, Prospective, Observational Study
Source: PubMed Central journal article supplement — Diabetes Ther. 2024 Jan 19;15(3):623–37. doi: 10.1007/s13300-023-01525-y (PMC10942937; doi:10.1007/s13300-023-01525-y), 2024-01-19
Supplement: 13300_2023_1525_MOESM1_ESM.pdf [file 13300_2023_1525_MOESM1_ESM.pdf]

# **Real-world Use of Oral Semaglutide in Adults with Type 2 Diabetes: the PIONEER REAL Switzerland Multicentre, Prospective, Observational Study**

Anastas Kick<sup>1</sup>, Khadija M'Rabet-Bensalah<sup>2</sup>, Flavio Acquistapace<sup>3</sup>, Hanan Amadid<sup>4</sup>,  
Robert A. Ambühl<sup>5</sup>, Uffe Christian Braae<sup>4</sup>, Flurin Item<sup>2</sup>, Bernd Schultes<sup>6</sup>, Thomas Züger<sup>7</sup>,  
Gottfried Rudofsky<sup>7,8</sup>

<sup>1</sup>Primary Care Group Practice Sanacare, Lugano, Switzerland

<sup>2</sup>Novo Nordisk Pharma AG, Zurich, Switzerland

<sup>3</sup>SCA: Primary Care Cardiological Practice, Lugano, Switzerland

<sup>4</sup>Novo Nordisk A/S, Søborg, Denmark

<sup>5</sup>Primary Care Practice Schöngrund, Rotkreuz, Switzerland

<sup>6</sup>Metabolic Center St. Gallen, friendlyDocs AG, St. Gallen, Switzerland

<sup>7</sup>Cantonal Hospital of Olten, Department of Endocrinology, Diabetes and Metabolic Diseases,  
Olten, Switzerland

<sup>8</sup>Practice for Endocrinology, Diabetes and Obesity, Olten, Switzerland

## **Corresponding author:**

Gottfried Rudofsky

Cantonal Hospital of Olten, Department of Endocrinology, Diabetes and Metabolic Diseases,  
Olten, Switzerland; Practice for Endocrinology, Diabetes and Obesity, Olten, Switzerland

**Tel:** 0041-62 552 52 00

**Email:** gottfried.rudofsky@hin.ch

## Table of contents

|                                                                                                                                       |    |
|---------------------------------------------------------------------------------------------------------------------------------------|----|
| List of investigators in the PIONEER REAL Switzerland study .....                                                                     | 3  |
| List of study sites and related IEC.....                                                                                              | 4  |
| Table S1 Inclusion and exclusion criteria .....                                                                                       | 5  |
| Table S2 HbA <sub>1c</sub> (%) change from baseline to EOS, by baseline HbA <sub>1c</sub> (in study – full analysis set).....         | 6  |
| Table S3 HbA <sub>1c</sub> (mmol/mol) change from baseline to EOS, by baseline HbA <sub>1c</sub> (in study – full analysis set) ..... | 8  |
| Fig. S1 Study design.....                                                                                                             | 10 |
| Fig. S2 Secondary and sensitivity analysis of the primary endpoint (change from baseline in HbA <sub>1c</sub> [%-points]) .....       | 11 |

### **List of investigators in the PIONEER REAL Switzerland study**

Beatrice Wirtner, Stefan Fischli, Janina Tütsch, Stefan Bilz, Tilman Drescher, Tomislav Simic, Thomas Züger, Gottfried Rudofsky, Matthias Hepprich, Beat Schmid, Robert Ambühl, Marc Donath, Mathias Betz, Bettina Winzeler, Katharina Timper, Eleonora Seelig, Jonathan Mudry, Fontana Enzo, Bernd Schultes, Caroline Christoffel-Courtin Vasiliki Bouroniki, Thurneysen Thomas, Karim El-Haschimi, Delgado Velez Humberto, Gamarra Elena, Acquistapace Flavio, Kick Anastas, Jürgen Wagner, Rassam-Hasso Jasmine, Thomas Niederhäuser, Sibai Karim, Faeli Meheran, Elizabeth Marti

## List of study sites and related IE

| Site number | Site                                         | IEC                                                                   |
|-------------|----------------------------------------------|-----------------------------------------------------------------------|
| 1044        | Gruppenpraxis Weststadt                      | Ethikkommission der Nordwest- und Zentralschweiz                      |
| 1045        | Kantonsspital Olten                          | Ethikkommission der Nordwest- und Zentralschweiz                      |
| 1050        | Universitaetsspital Basel                    | Ethikkommission der Nordwest- und Zentralschweiz                      |
| 1051        | HFR Fribourg - Kantonsspital Freiburg        | Commission cantonale (VD) d'éthique de la recherche sur l'être humain |
| 1052        | friendlyDocs AG                              | Ethikkommission Ostschweiz                                            |
| 1053        | Dr. Thurneysen Thomas Private practice       | Commission cantonale (VD) d'éthique de la recherche sur l'être humain |
| 1054        | Diabetologie & Endokrinologie Baden          | Ethikkommission der Nordwest- und Zentralschweiz                      |
| 1055        | Clinique de la Lignière                      | Commission cantonale (VD) d'éthique de la recherche sur l'être humain |
| 1058        | SCA: Primary Care Cardiological Practice     | Comitato etico cantonale Ticino                                       |
| 1060        | Gemeinschaftspraxis                          | Ethikkommission Ostschweiz (EKOS)                                     |
| 1061        | Clinique de Genolier                         | Commission cantonale (VD) d'éthique de la recherche sur l'être humain |
| 1062        | Dr. Michaël Hagmann Private Practice         | Commission cantonale (VD) d'éthique de la recherche sur l'être humain |
| 1063        | Elfenaupraxis                                | Kantonale Ethikkommission Bern (KEK-Bern)                             |
| 1064        | Generale-Beaulieu Clinique                   | Commission cantonale (VD) d'éthique de la recherche sur l'être humain |
| 1065        | Dr. Mehran Faeli Private Praxis              | Comitato etico cantonale Ticino                                       |
| 1048        | MedicoPlus Health Care AG                    | Ethikkommission der Nordwest- und Zentralschweiz (EKNZ)               |
| 1049        | Praxis Schöngrund                            | Ethikkommission der Nordwest- und Zentralschweiz (EKNZ)               |
| 1042        | Luzerner Kantonsspital                       | Ethikkommission der Nordwest- und Zentralschweiz (EKNZ)               |
| 1043        | Kantonsspital St. Gallen                     | Ethikkommission Ostschweiz (EKOS)                                     |
| 1067        | Gruppenpraxis Weststadt                      | Ethikkommission der Nordwest- und Zentralschweiz (EKNZ)               |
| 1041        | Dr. Beatrice Wirtner Muamba private practice | Ethikkommission Zurich                                                |
| 1046        | Kantonsspital Schaffhausen                   | Ethikkommission Zurich                                                |

IEC, Independent Ethics Committee.

**Table S1** Inclusion and exclusion criteria

|                                                                                                                                                                                                                                                                                                                                                                                                                                                                                                                                                                                                                                                                                                                                                                                                                                                                                                                                                                                                                                                                                                                                                                                                                                                                           |
|---------------------------------------------------------------------------------------------------------------------------------------------------------------------------------------------------------------------------------------------------------------------------------------------------------------------------------------------------------------------------------------------------------------------------------------------------------------------------------------------------------------------------------------------------------------------------------------------------------------------------------------------------------------------------------------------------------------------------------------------------------------------------------------------------------------------------------------------------------------------------------------------------------------------------------------------------------------------------------------------------------------------------------------------------------------------------------------------------------------------------------------------------------------------------------------------------------------------------------------------------------------------------|
| <p><b>Inclusion criteria</b></p> <p>For an eligible patient, all inclusion criteria must be answered “yes”.</p> <ol style="list-style-type: none"><li>1. Signed consent obtained before any study-related activities (study-related activities are any procedure related to the recording of data according to the protocol)</li><li>2. Diagnosed with type 2 diabetes mellitus</li><li>3. The decision to initiate treatment with commercially available oral semaglutide has been made by the patient/legally acceptable representative and the treating physician based on local label before and independently from the decision to include the patient in this study</li><li>4. Male or female, aged <math>\geq 18</math> years at the time of signing the informed consent</li><li>5. Available HbA<sub>1c</sub> value <math>\leq 90</math> days prior to the ‘informed consent and treatment initiation visit’ (V1) or HbA<sub>1c</sub> measurement taken in relation with the ‘informed consent and treatment initiation visit’ (V1) if in line with local clinical practice</li><li>6. Treatment naïve to injectable glucose-lowering drug(s). An exception is short-term insulin treatment for acute illness for a total of <math>\leq 14</math> days</li></ol> |
| <p><b>Exclusion criteria</b></p> <p>For an eligible patient, all exclusion criteria must be answered “no”.</p> <ol style="list-style-type: none"><li>1. Previous participation in this study. Participation is defined as having given informed consent in this study</li><li>2. Treatment with any investigational drug within 30 days prior to enrolment into the study</li><li>3. Mental incapacity, unwillingness or language barriers precluding adequate understanding or cooperation</li></ol>                                                                                                                                                                                                                                                                                                                                                                                                                                                                                                                                                                                                                                                                                                                                                                     |

HbA<sub>1c</sub> glycated haemoglobin

**Table S2** HbA<sub>1c</sub> (%) change from baseline to EOS, by baseline HbA<sub>1c</sub> (in study – full analysis set)

|                                      |              |
|--------------------------------------|--------------|
| <b>HbA<sub>1c</sub> (%)</b>          |              |
| <b>HbA<sub>1c</sub>, ≤7%</b>         |              |
| N                                    | 66           |
| n                                    | 60           |
| Observed mean at baseline            | 6.39         |
| Estimated mean at EOS                | 6.08         |
| Estimated mean change from baseline  | -0.31        |
| SE                                   | 0.14         |
| 95% CI                               | -0.59, -0.03 |
| <i>P</i> value                       | 0.0302       |
| <b>HbA<sub>1c</sub>, &gt;7 - ≤8%</b> |              |
| N                                    | 56           |
| n                                    | 55           |
| Observed mean at baseline            | 7.51         |
| Estimated mean at EOS                | 6.69         |
| Estimated mean change from baseline  | -0.82        |
| SE                                   | 0.14         |
| 95% CI                               | -1.09, -0.55 |
| <i>P</i> value                       | <0.0001      |
| <b>HbA<sub>1c</sub>, &gt;8 - ≤9%</b> |              |
| N                                    | 31           |
| n                                    | 26           |
| Observed mean at baseline            | 8.47         |
| Estimated mean at EOS                | 7.47         |
| Estimated mean change from baseline  | -1.00        |
| SE                                   | 0.18         |
| 95% CI                               | -1.35, -0.65 |
| <i>P</i> value                       | <0.0001      |
| <b>HbA<sub>1c</sub>, &gt;9%</b>      |              |
| N                                    | 32           |

|                                     |              |
|-------------------------------------|--------------|
| n                                   | 30           |
| Observed mean at baseline           | 10.36        |
| Estimated mean at EOS               | 8.26         |
| Estimated mean change from baseline | -2.10        |
| SE                                  | 0.17         |
| 95% CI                              | -2.44, -1.76 |
| <i>P</i> value                      | <0.0001      |

CI, confidence interval, EOS, end of study; N, number of participants in full analysis set, n, number of participants in statistical analysis; SE, standard error.

**Table S3** HbA<sub>1c</sub> (mmol/mol) change from baseline to EOS, by baseline HbA<sub>1c</sub> (in study – full analysis set)

| <b>HbA<sub>1c</sub> (mmol/mol)</b>   |               |
|--------------------------------------|---------------|
| <b>HbA<sub>1c</sub>, ≤7%</b>         |               |
| N                                    | 66            |
| n                                    | 60            |
| Observed mean at baseline            | 46.31         |
| Estimated mean at EOS                | 42.95         |
| Estimated mean change from baseline  | -3.36         |
| SE                                   | 1.54          |
| 95% CI                               | -6.41, -0.32  |
| <i>P</i> value                       | 0.0308        |
| <b>HbA<sub>1c</sub>, &gt;7 - ≤8%</b> |               |
| N                                    | 56            |
| n                                    | 55            |
| Observed mean at baseline            | 58.61         |
| Estimated mean at EOS                | 49.61         |
| Estimated mean change from baseline  | -9.00         |
| SE                                   | 1.48          |
| 95% CI                               | -11.93, -6.07 |
| <i>P</i> value                       | <0.0001       |
| <b>HbA<sub>1c</sub>, &gt;8 - ≤9%</b> |               |
| N                                    | 31            |
| n                                    | 26            |
| Observed mean at baseline            | 69.03         |
| Estimated mean at EOS                | 58.15         |
| Estimated mean change from baseline  | -10.88        |
| SE                                   | 1.94          |
| 95% CI                               | -14.71, -7.04 |
| <i>P</i> value                       | <0.0001       |
| <b>HbA<sub>1c</sub>, &gt;9%</b>      |               |
| N                                    | 32            |



|                                     |                |
|-------------------------------------|----------------|
| n                                   | 30             |
| Observed mean at baseline           | 89.70          |
| Estimated mean at EOS               | 66.77          |
| Estimated mean change from baseline | -22.93         |
| SE                                  | 1.87           |
| 95% CI                              | -26.62, -19.24 |
| <i>P</i> value                      | <0.0001        |

CI, confidence interval, EOS, end of study; N, number of participants in full analysis set, n, number of participants in statistical analysis; SE, standard error.

**Fig. S1** Study design

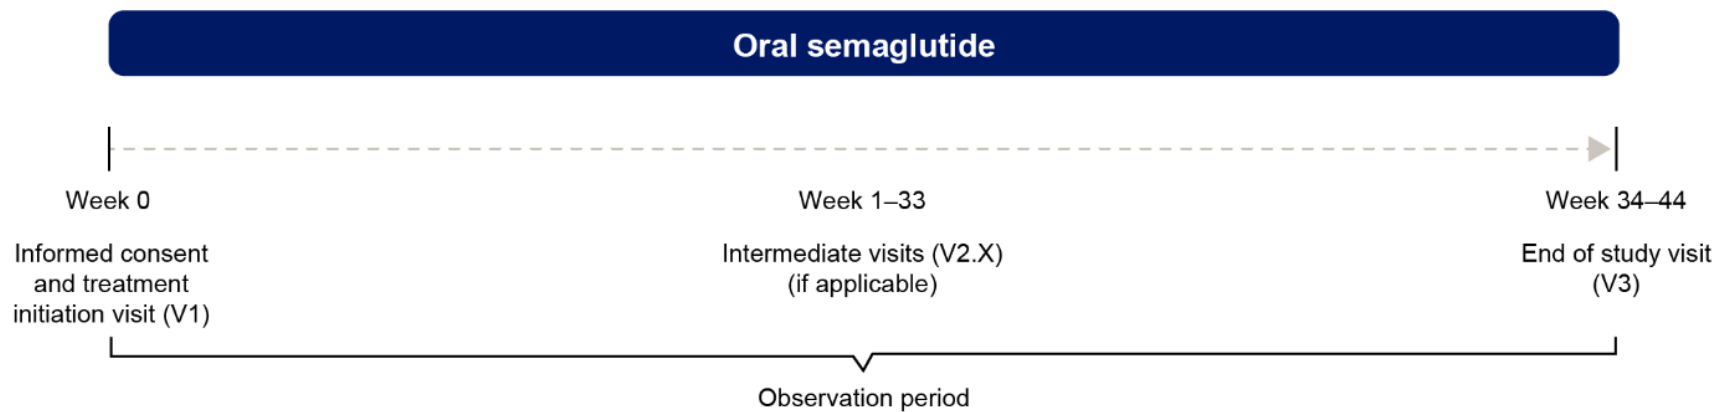

V visit

**Fig. S2** Secondary and sensitivity analysis of the primary endpoint (change from baseline in HbA<sub>1c</sub> [%-points])

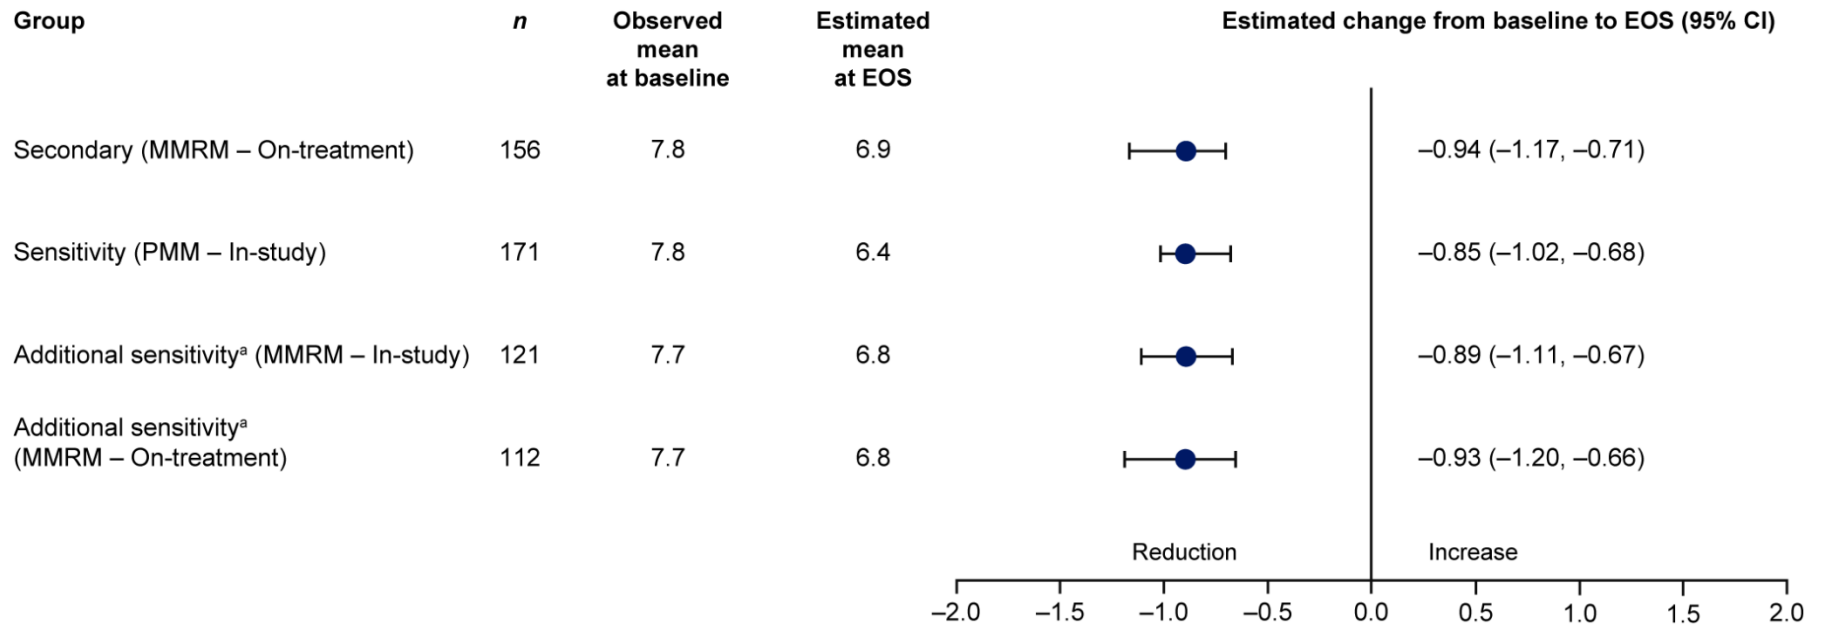

*CI* confidence interval, *EOS* end of study, *HbA<sub>1c</sub>* glycated haemoglobin, *MMRM* mixed model for repeated measurements, *PMM* pattern mixture model

*n* is the total number of patients contributing to the statistical analysis

Estimates (95% CI) from the adjusted models are plotted

<sup>a</sup>Where participants with an EOS visit outside the EOS window were excluded from the analyses
